# Supplementary material
Source: PubMed Central journal article supplement (PMC55400)

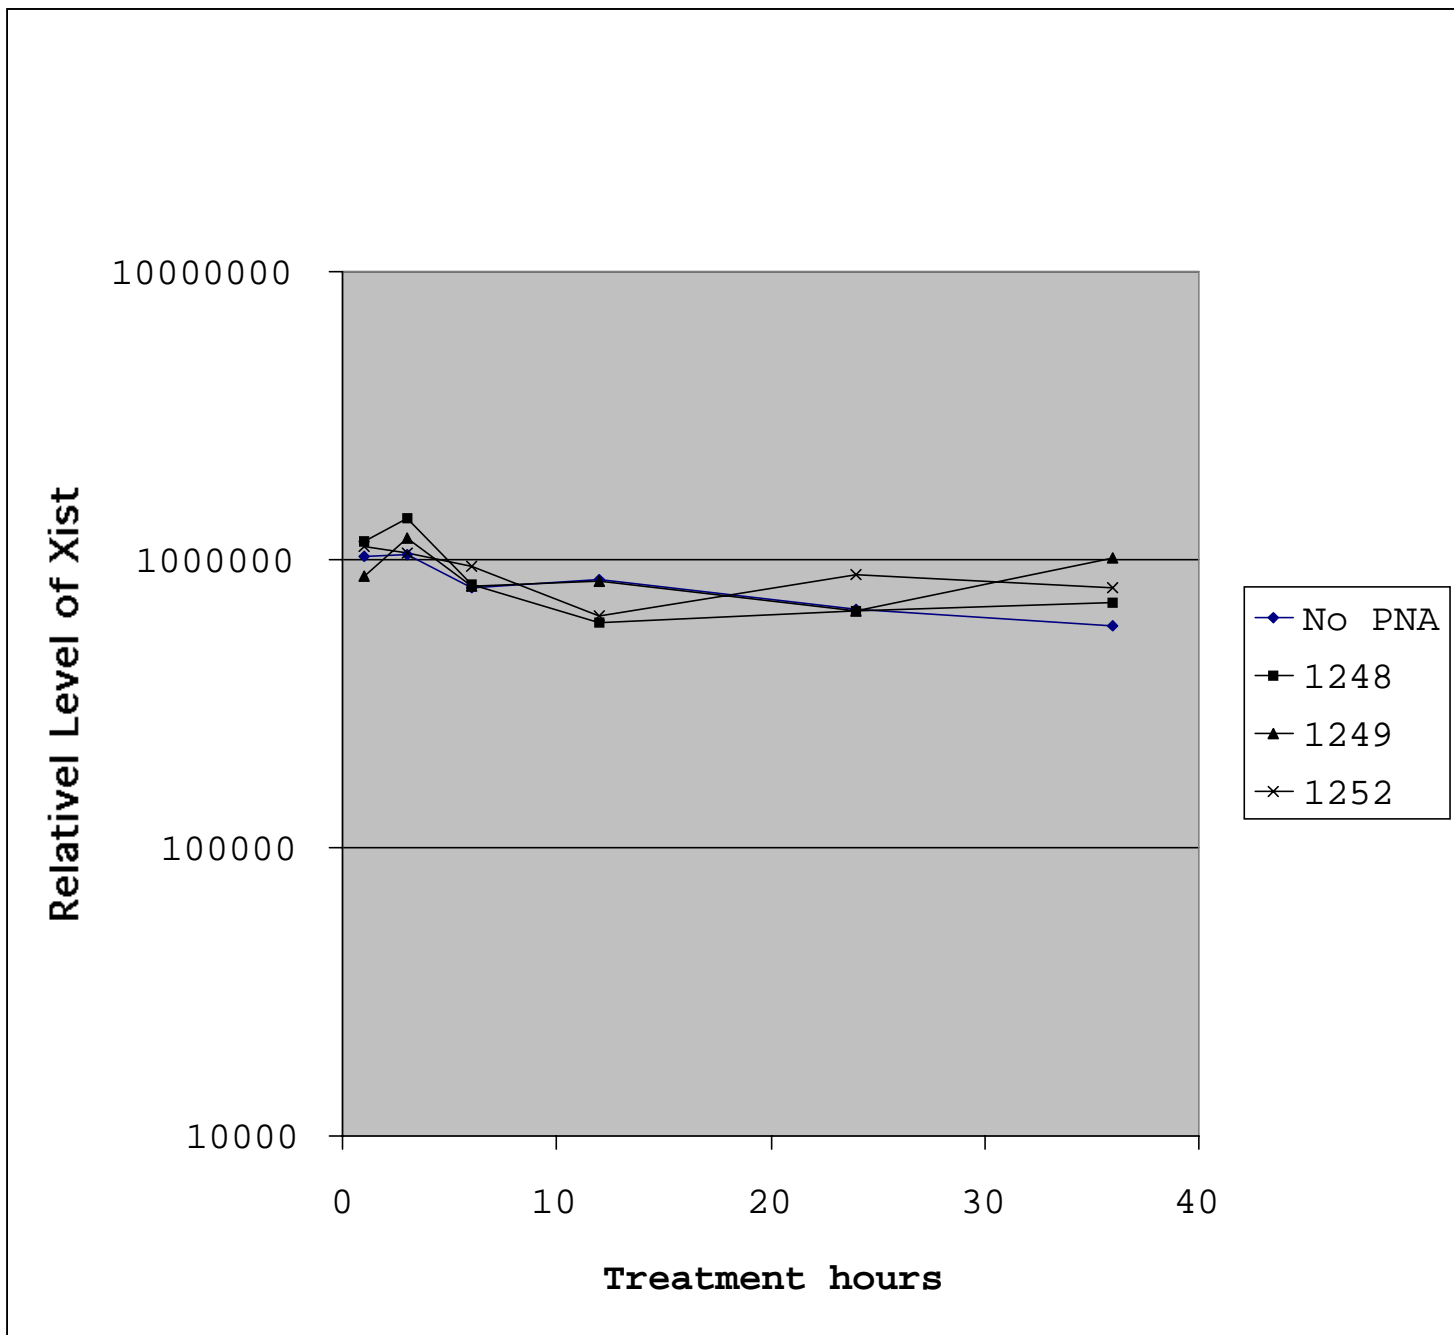

A

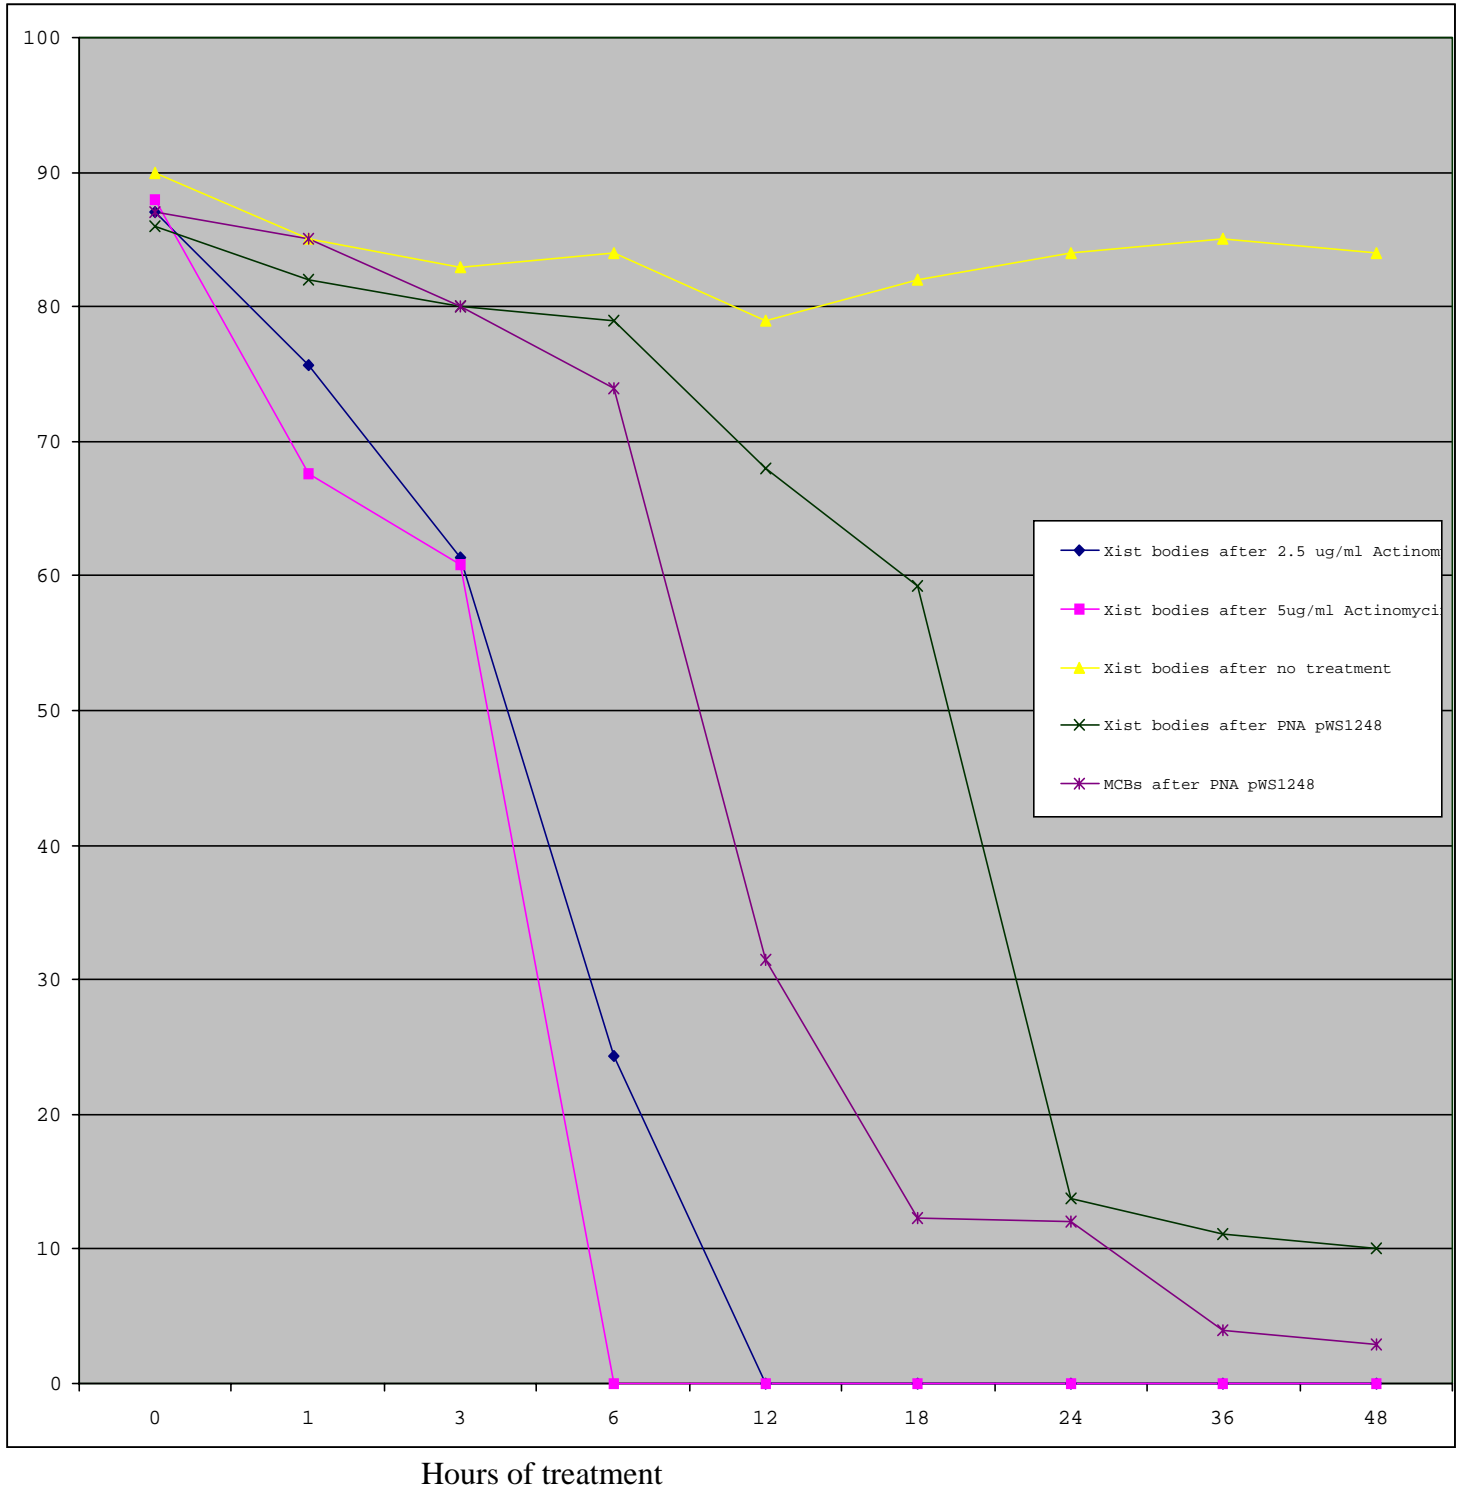

**B**

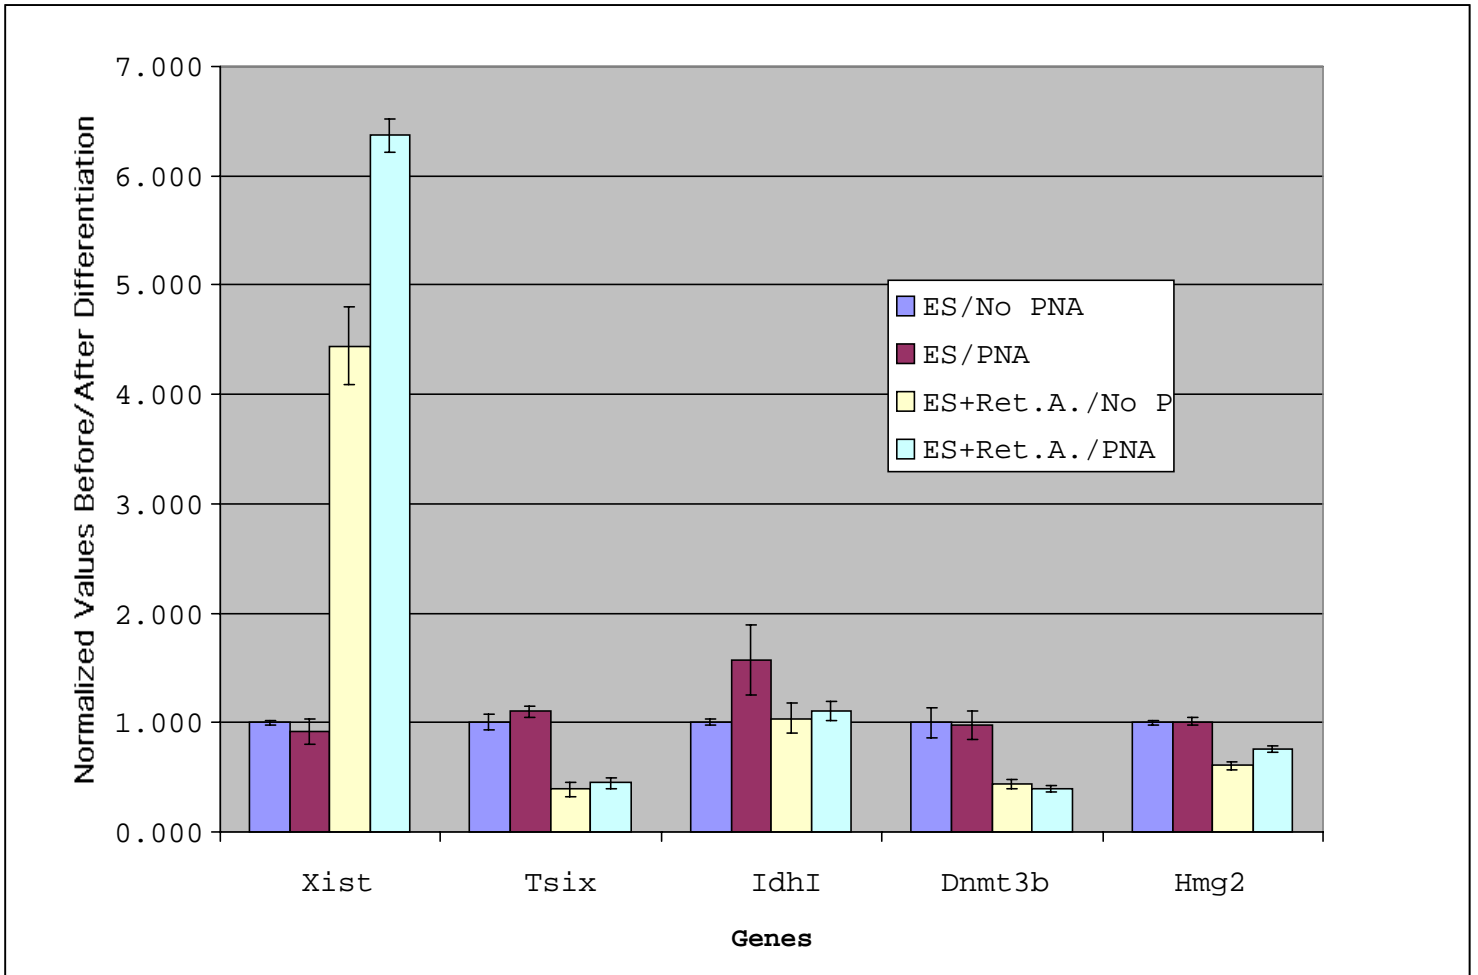

C

Supplement: pnas_98_16_9215__2.pdf [file pnas_98_16_9215__2.pdf]
